# Supplementary material for: Integrated multiomic approach for identification of novel immunotherapeutic targets in AML
Source: PubMed Central journal article supplement (PMC9185890; doi:10.1186/s40364-022-00390-4), 2022-06-10
Supplement: 40364_2022_390_MOESM5_ESM.pdf [file 40364_2022_390_MOESM5_ESM.pdf]

**A**

|      | HSC_BM | early HPC_BM | CD14+ monocytes |
|------|--------|--------------|-----------------|
| Mean | 6.414  | 6.461        | 7.006           |
| SD   | 2.651  | 2.581        | 3.137           |

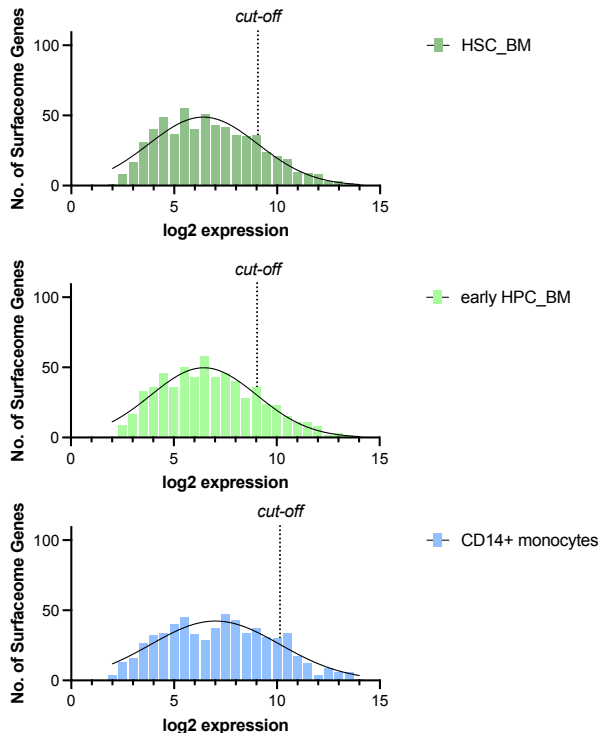**B**

|      | Average Non-Heme Tissue Expression | Maximal Non-Heme Tissue Expression |
|------|------------------------------------|------------------------------------|
| Mean | 2.803                              | 4.586                              |
| SD   | 2.368                              | 2.008                              |

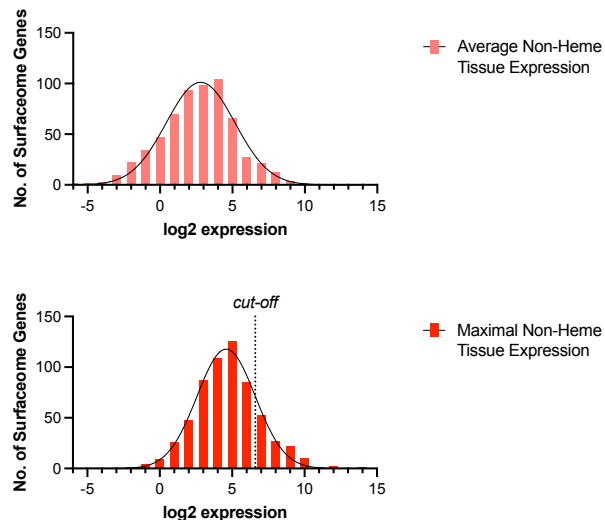

**Supplementary Figure S1. Expression patterns and cut-off determination for AML Surfaceome.** A: Expression of Surfaceome genes in hematopoietic stem cells in the bone marrow (HSCs – top panel), early hematopoietic progenitors in the bone marrow (HPC, middle panel) and CD14+ monocytes (bottom panel). Data derived from BloodSpot database (HemaExplorer). Cut-off used for filtering of Surfaceome candidates shown (calculated as the mean + SD). B: Expression of Surfaceome genes in non-hematopoietic tissue, displaying average non-heme tissue expression (top panel) or maximal non-heme tissue expression (from Genotype-Tissue Expression Project - GTEx). Cut-off used for filtering of Surfaceome candidates shown (calculated as the mean + SD).
