# Supplementary material for: Integrated multiomic approach for identification of novel immunotherapeutic targets in AML
Source: PubMed Central journal article supplement (PMC9185890; doi:10.1186/s40364-022-00390-4), 2022-06-10
Supplement: 40364_2022_390_MOESM7_ESM.pdf [file 40364_2022_390_MOESM7_ESM.pdf]

## PDX1

---

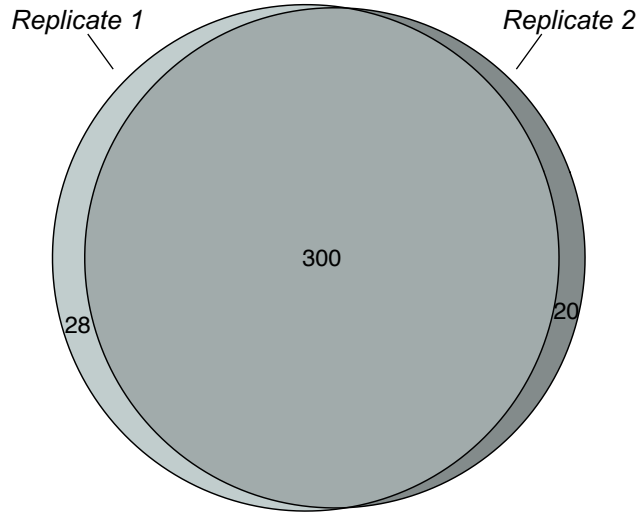

**Supplementary Figure S3. Number of proteins identified in technical replicates.** Venn Diagram representing number of unique proteins identified by our modified CSC workflow from a xeno-amplified AML specimen (PDX1) processed separately. >90% of proteins were identified in both runs, suggesting highly robust identification of the surface proteome.
